# Supplementary material for: Assessment of the Efficiency of Cultivated Land Occupied by Urban and Rural Construction Land in China from 1990 to 2020
Source: MDPI journal article supplement (doi:10.3390/land11060941), 2022-06-18
Supplement: s1 [file s1]

Archive with 1 entries (1 files):
- land-1750719-supplementary.pdf
